# Supplementary material
Source: publisher figshare collection journal article supplement (https://tandf.figshare.com/articles/dataset/_/4197858)
Supplement: Supplementary file 2 [file 1]

Archive with 2 entries (2 files):
- hmbr_a_1235965_sm8429.pdf
- hmbr_a_1235965_sm8427.pdf
